# Supplementary material for: MACF1 promotes preosteoblast migration by mediating focal adhesion turnover through EB1
Source: PubMed Central journal article supplement (PMC7104863; doi:10.1242/bio.048173), 2020-03-24
Supplement: biolopen-9-048173-s1.pdf [file biolopen-9-048173-s1.pdf]

### Supplementary data

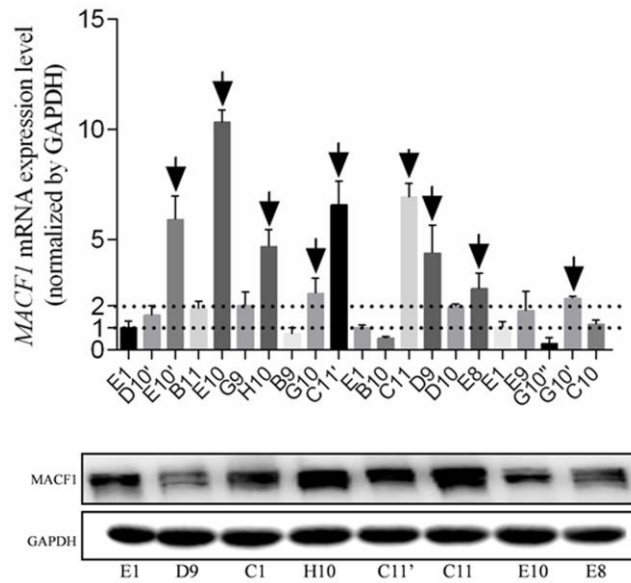

**Figure. S1** The establishment of MACF1 overexpression MC3T3-E1 cell. MACF1 expression was detected by qPCR and western blot.
